# Supplementary material
Source: publisher figshare collection journal article supplement (https://tandf.figshare.com/ndownloader/files/16343588)
Supplement: Supplementary file 1 [file 16343588]

## **Vitamin D-conjugated gold nanoparticles as functional carriers to enhancing osteogenic differentiation**

Haram Nah<sup>a,1</sup>, Donghyun Lee<sup>b, c, 1</sup>, Min Heo<sup>b</sup>, Jae Seo Lee<sup>a</sup>, Sang Jin Lee<sup>b</sup>, Dong Nyoung Heo<sup>b</sup>, Jeongmin Seong<sup>d</sup>, Ho-Nam Lim<sup>b</sup>, Yeon-Hee Lee<sup>e</sup>, Ho-Jin Moon<sup>b</sup>, Yu-Shik Hwang<sup>f,\*</sup>, Il Keun Kwon<sup>b,\*</sup>

<sup>a</sup> *Department of Dentistry, Graduate School, Kyung Hee University, 26 Kyungheedaero, Dongdaemun-gu, Seoul 02447, Republic of Korea*

<sup>b</sup> *Department of Dental Materials, School of Dentistry, Kyung Hee University, 26 Kyungheedaero, Dongdaemun-gu, Seoul 02447, Republic of Korea*

<sup>c</sup> *Laboratory Animal Center, Daegu-Gyeongbuk Medical Innovation Foundation, 80 Cheombok-ro, Dong-gu, Daegu 41061, Republic of Korea*

<sup>d</sup> *Department of Dental Hygiene, College of Health Science, Kangwon National University, 346, Hwangjo-gil, Dogye-eup, Samcheok-si, Gangwon-do 25949, Republic of Korea*

<sup>e</sup> *Department of Orofacial Pain and Oral Medicine, School of Dentistry, Kyung Hee University, 26, Kyungheedaero, Dongdaemun-gu, Seoul 02477, Republic of Korea*

<sup>f</sup> *Department of Maxillofacial Biomedical Engineering, School of Dentistry, Kyung Hee University, 26, Kyungheedaero, Dongdaemun-gu, Seoul 02477, Republic of Korea*

\*Corresponding Author:

Yu-Shik Hwang, Ph. D.

Department of Maxillofacial Biomedical Engineering, School of Dentistry, Kyung Hee University, 26, Kyungheedaero, Dongdaemun-gu, Seoul 02477, Korea

Tel.: 82-2-961-2318; Fax: 82-2-967-5019

E-mail address: [yshwang@khu.ac.kr](mailto:yshwang@khu.ac.kr) (Yu-Shik Hwang)

Il Keun Kwon, Ph. D.

Department of Dental Materials, School of Dentistry, Kyung Hee University, 26,

Kyungheedaero-ro, Dongdaemun-gu, Seoul 02477, Korea

Tel.: 82-2-961-0350; Fax: 82-2-960-1457

E-mail address: [kwoni@khu.ac.kr](mailto:kwoni@khu.ac.kr) (Il Keun Kwon).

<sup>1</sup>These authors equally contributed to this work.

## Supplementary figure captions:

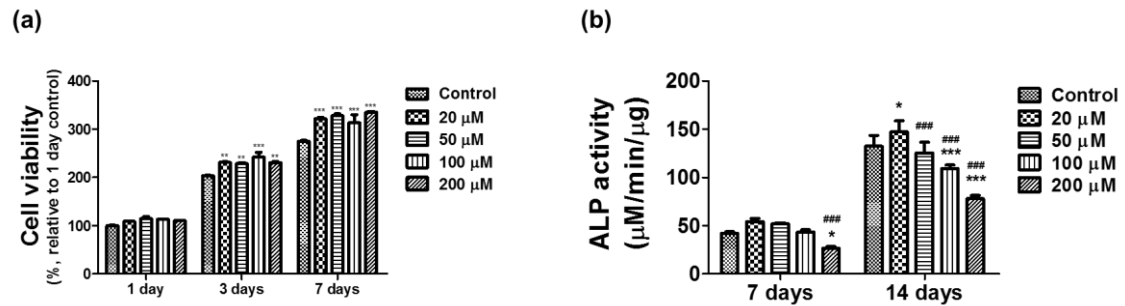

Supplementary Figure 1. Evaluation of cell viability (a) and ALP activity (b) of hADSCs: cell viability performed after 1, 3, and 7 days of culture at non-treated GM (control), 20  $\mu\text{M}$  GNPs treated GM, 50  $\mu\text{M}$  GNPs treated GM, 100  $\mu\text{M}$  GNPs treated GM, and 200  $\mu\text{M}$  GNPs treated GM. ALP activity performed after 7 and 14 days of culture at non-treated OM (control), 20  $\mu\text{M}$  GNPs treated OM, 50  $\mu\text{M}$  GNPs treated OM, 100  $\mu\text{M}$  GNPs treated OM, and 200  $\mu\text{M}$  GNPs treated OM.  $n=4$ , \* $p < 0.05$ , \*\* $p < 0.01$ , and \*\*\* $p < 0.001$  compared with the control group, ### $p < 0.001$  compared with the 20  $\mu\text{M}$  GNPs treated OM group.

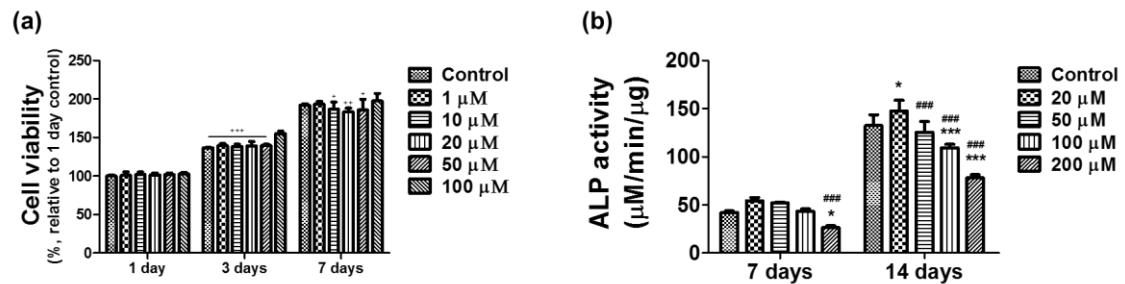

Supplementary Figure 2. Evaluation of cell viability (a) and ALP activity (b) of hADSCs: cell viability performed after 1, 3, and 7 days of culture at non-treated GM (control), 1 μM SPVD treated GM, 5 μM SPVD treated GM, 10 μM SPVD treated GM, 20 μM SPVD treated GM, 50 μM SPVD treated GM, and 100 μM SPVD treated GM. ALP activity performed after 7 and 14 days of culture at non-treated OM (control), 1 μM SPVD treated OM, 5 μM SPVD treated OM, 10 μM SPVD treated OM and 20 μM SPVD treated OM. n=4, +p < 0.05, ++p < 0.01, and +++p < 0.001 compared with the 100 μM group, \*p < 0.05, and \*\*\*p < 0.001 compared with the control group.
